# Supplementary material
Source: HighWire-hosted journal article supplement (https://diabetes.diabetesjournals.org/content/suppl/2006/05/31/55.6.1592)
Supplement: db1357onlineappendix.pdf [file db1357onlineappendix.pdf]

**Table 1. Characteristics of control and transgenic NOD mice at the age of 5 to 7 weeks.**

|               | <b>Body weight<br/>(gram)</b> | <b>Non-fasting<br/>blood glucose<br/>(mg/dl)</b> | <b>Pancreas insulin<br/>(<math>\mu</math>g/gram tissue)</b> | <b>Islet DNA<br/>(ng/islet)</b> | <b>Islet insulin<br/>(ng/islet)</b> | <b>Islet Gpx<br/>activity<br/>(mU/mg<br/>protein)</b> |
|---------------|-------------------------------|--------------------------------------------------|-------------------------------------------------------------|---------------------------------|-------------------------------------|-------------------------------------------------------|
| <b>NOD</b>    | 22.4 $\pm$ 0.4<br>(30)        | 127 $\pm$ 4<br>(30)                              | 56.59 $\pm$ 3.70<br>(9)                                     | 18.00 $\pm$ 1.66<br>(8)         | 41.35 $\pm$ 6.11<br>(8)             | 16.78 $\pm$ 2.12<br>(4)                               |
| <b>MTNOD</b>  | 22.2 $\pm$ 0.8<br>(17)        | 120 $\pm$ 5<br>(17)                              | 59.37 $\pm$ 8.22<br>(7)                                     | 17.16 $\pm$ 1.96<br>(5)         | 43.40 $\pm$ 2.13<br>(6)             | 19.47 $\pm$ 1.73<br>(4)                               |
| <b>CatNOD</b> | 22.8 $\pm$ 0.5<br>(12)        | 125 $\pm$ 4<br>(12)                              | 51.77 $\pm$ 5.52<br>(7)                                     | 16.44 $\pm$ 0.92<br>(5)         | 40.89 $\pm$ 5.07<br>(6)             | 17.11 $\pm$ 1.87<br>(4)                               |

Data are means  $\pm$  SE. Figures inside brackets denote number of mice or independent assays. No significant difference was found between groups by one way ANOVA.
